# Supplementary material for: Co nanoparticles embedded in a 3D CoO matrix for electrocatalytic hydrogen evolution
Source: Royal Society of Chemistry journal article supplement (doi:10.1039/c6ra07538j), 2016-01-01
Supplement: c6ra07538j1.pdf [file c6ra07538j1.pdf]

## Supporting information

### Co nanoparticles embedded in 3D CoO matrix for electrocatalytic hydrogen evolution

Xiangye Liu<sup>a</sup>, Chenlong Dong<sup>a</sup>, Wujie Dong<sup>a</sup>, Xin Wang<sup>a</sup>, Xiaotao Yuan<sup>a</sup>, Fuqiang Huang<sup>a,b,\*</sup>

<sup>a</sup> Beijing National Laboratory for Molecular Sciences and State Key Laboratory of Rare Earth Materials Chemistry and Applications, College of Chemistry and Molecular Engineering, Peking University, Beijing 100871, P.R. China;

<sup>b</sup> CAS Key Laboratory of Materials for Energy Conversion and State Key Laboratory of High Performance Ceramics and Superfine Microstructures, Shanghai Institute of Ceramics, Chinese Academy of Sciences, Shanghai 200050, P.R. China.

\* Corresponding author, E-mail addresses: huangfq@pku.edu.cn

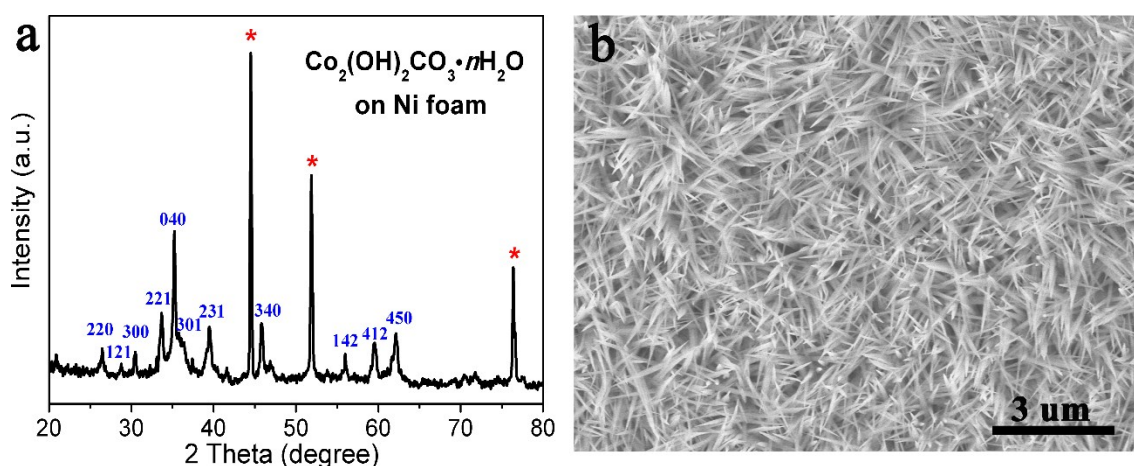

**Figure S1.** (a) XRD pattern and (b) SEM image of  $\text{Co}_2(\text{OH})_2\text{CO}_3 \cdot n\text{H}_2\text{O}$  nanowire arrays on Ni foam

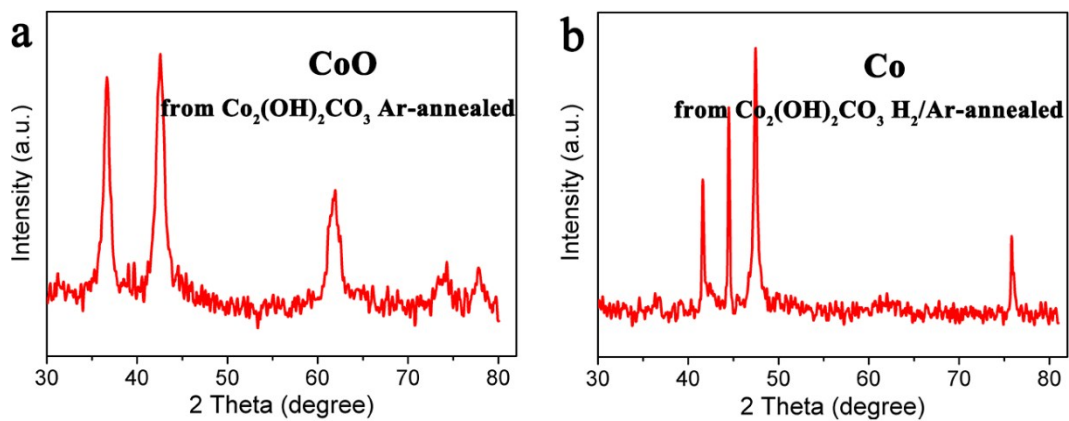

**Figure S2.** (a) XRD pattern of CoO powder which is obtained from  $\text{Co}_2(\text{OH})_2\text{CO}_3 \cdot n\text{H}_2\text{O}$  annealed in Ar at 350 °C for 2h. (b) XRD pattern of Co powder which is obtained from  $\text{Co}_2(\text{OH})_2\text{CO}_3 \cdot n\text{H}_2\text{O}$  annealed in  $\text{H}_2/\text{Ar}$  at 260 °C for 2h.

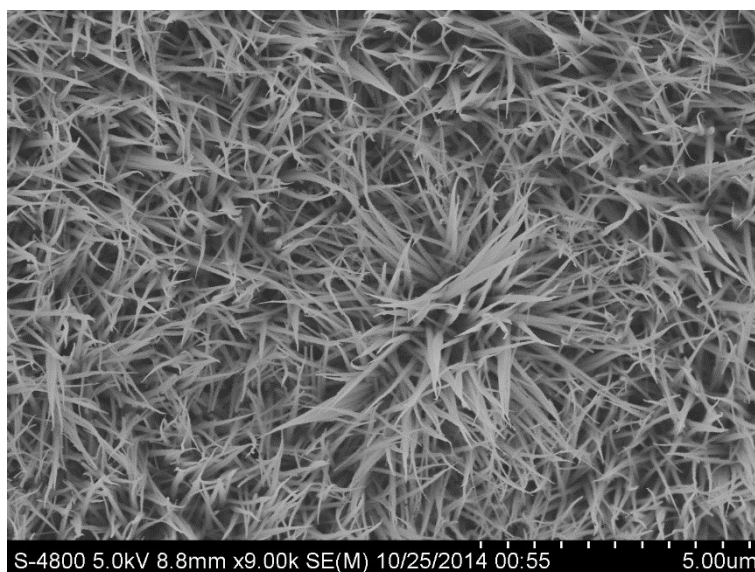

**Figure S3.** SEM image of Co/CoO nanowire array after after a long-period (24 h) HER measurement.

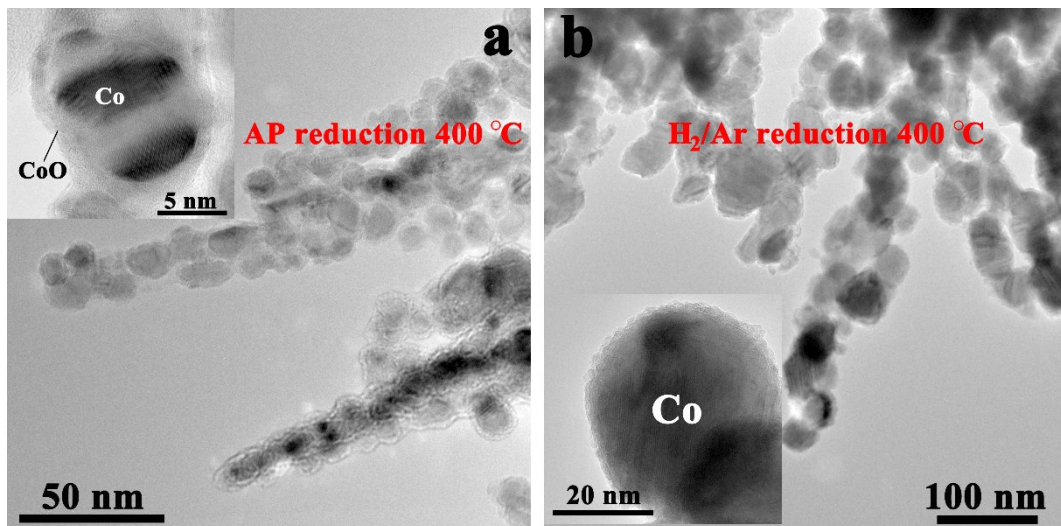

**Figure S4.** TEM images of (a) Sample IV prepared by Al powder reduction at 400 °C and (b) Sample V prepared by H<sub>2</sub>/Ar reduction at 260 °C.
